# Supplementary material for: Regulation of HECW2 expression in Alcohol Use Disorder, therapy outcome and risk of relapse
Source: Research Square preprint supplement (doi:10.21203/rs.3.rs-8133046/v1), 2025-12-08
Supplement: Supplementary file 1 [file 6928cad3d629d3ebaa2fa867.docx]

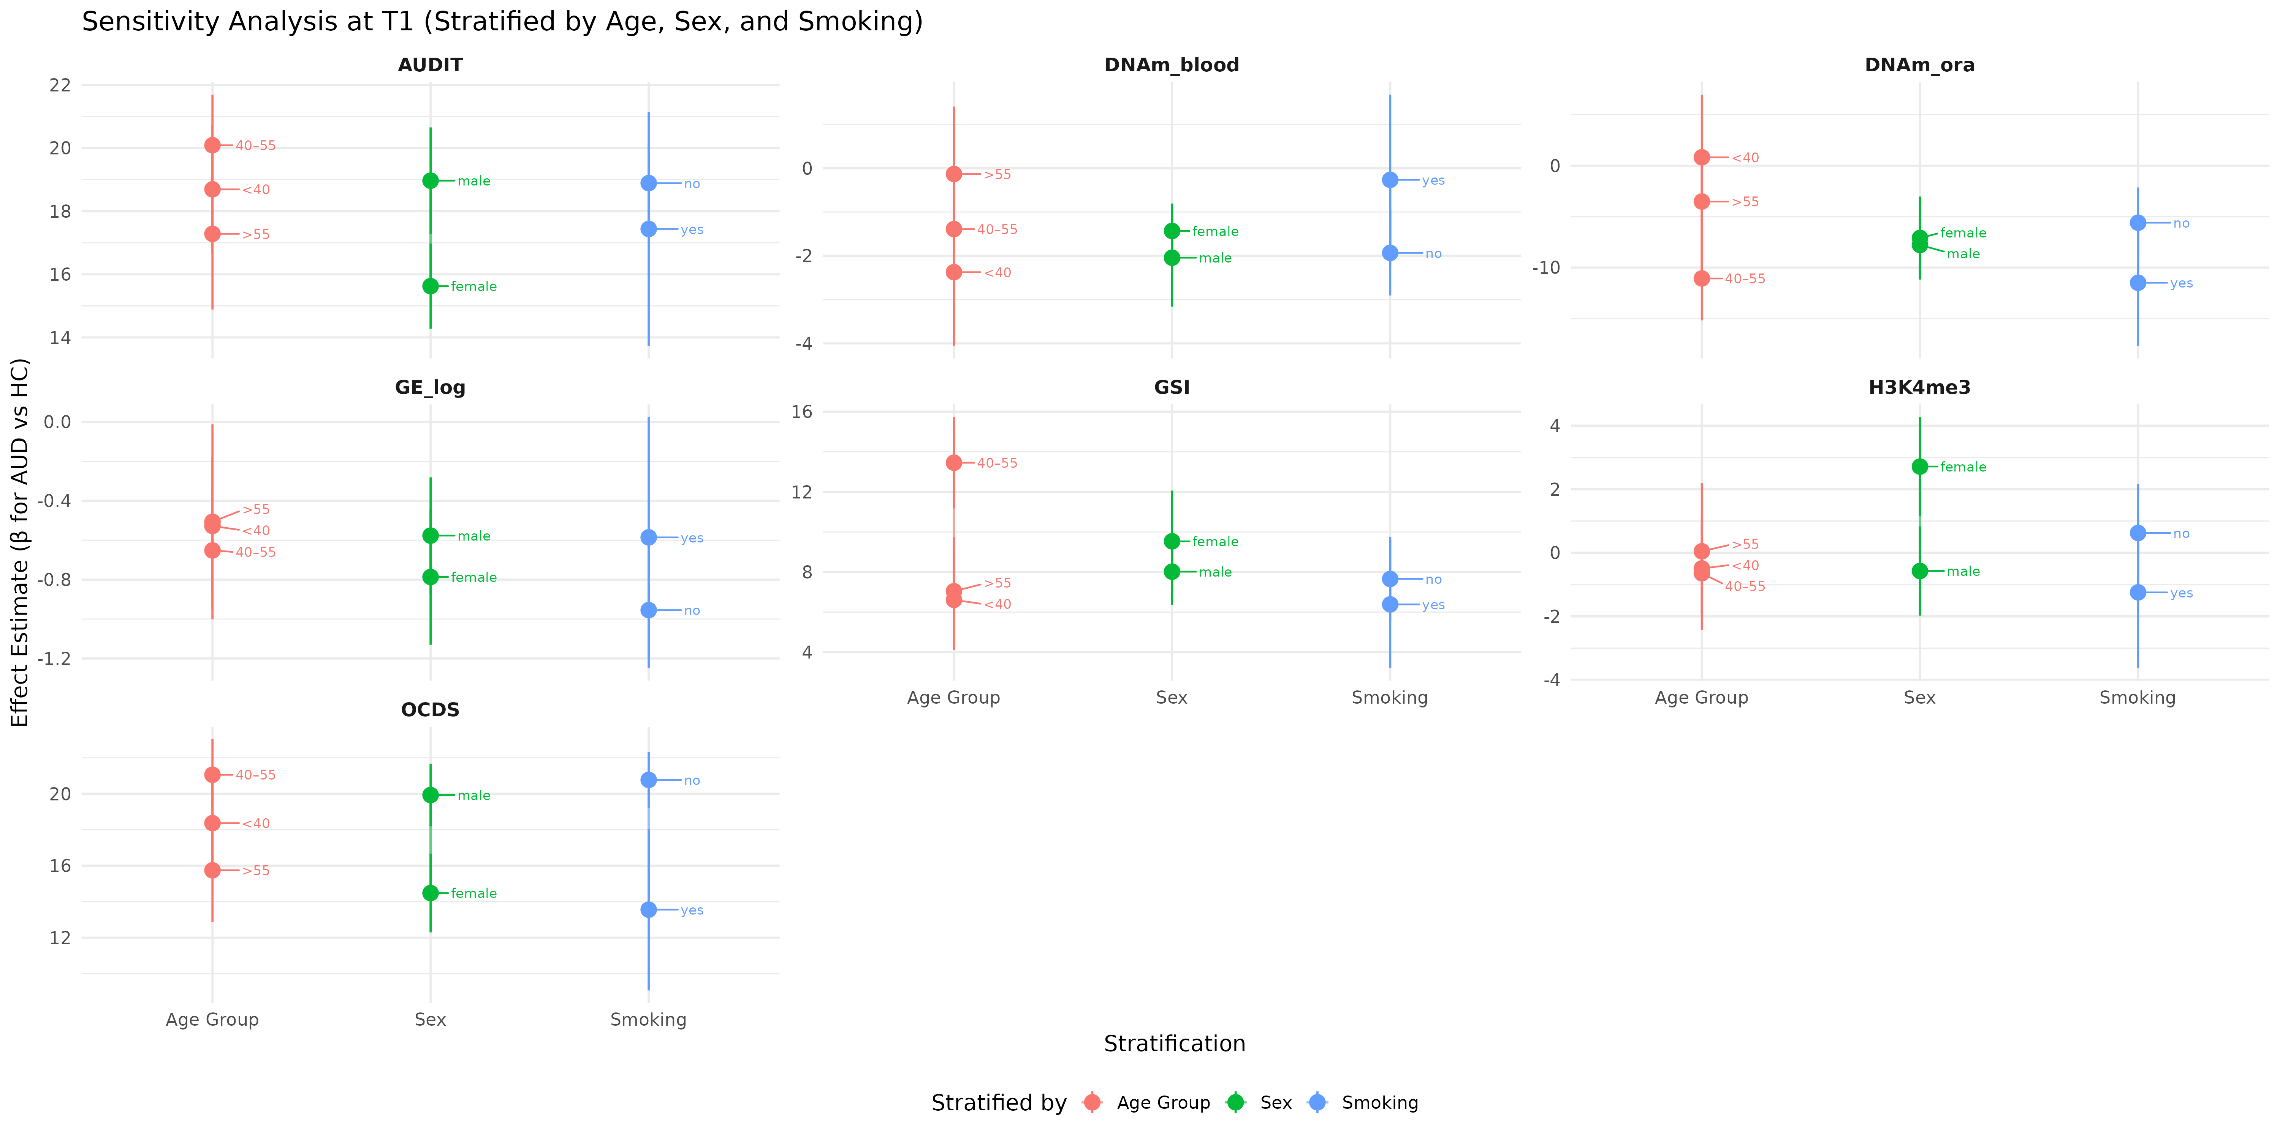


**Figure S1. Sensitivity analysis of AUD-associated questionnaire scores and molecular variables at baseline (T1), stratified by age group (<40, 40–55, >55), sex (male, female), and smoking status (yes, no).** Points represent β estimates for the AUD versus HC comparison from linear models, with error bars showing ±1 standard error. Lines connect points within each stratification type, and labels indicate the specific stratum level.


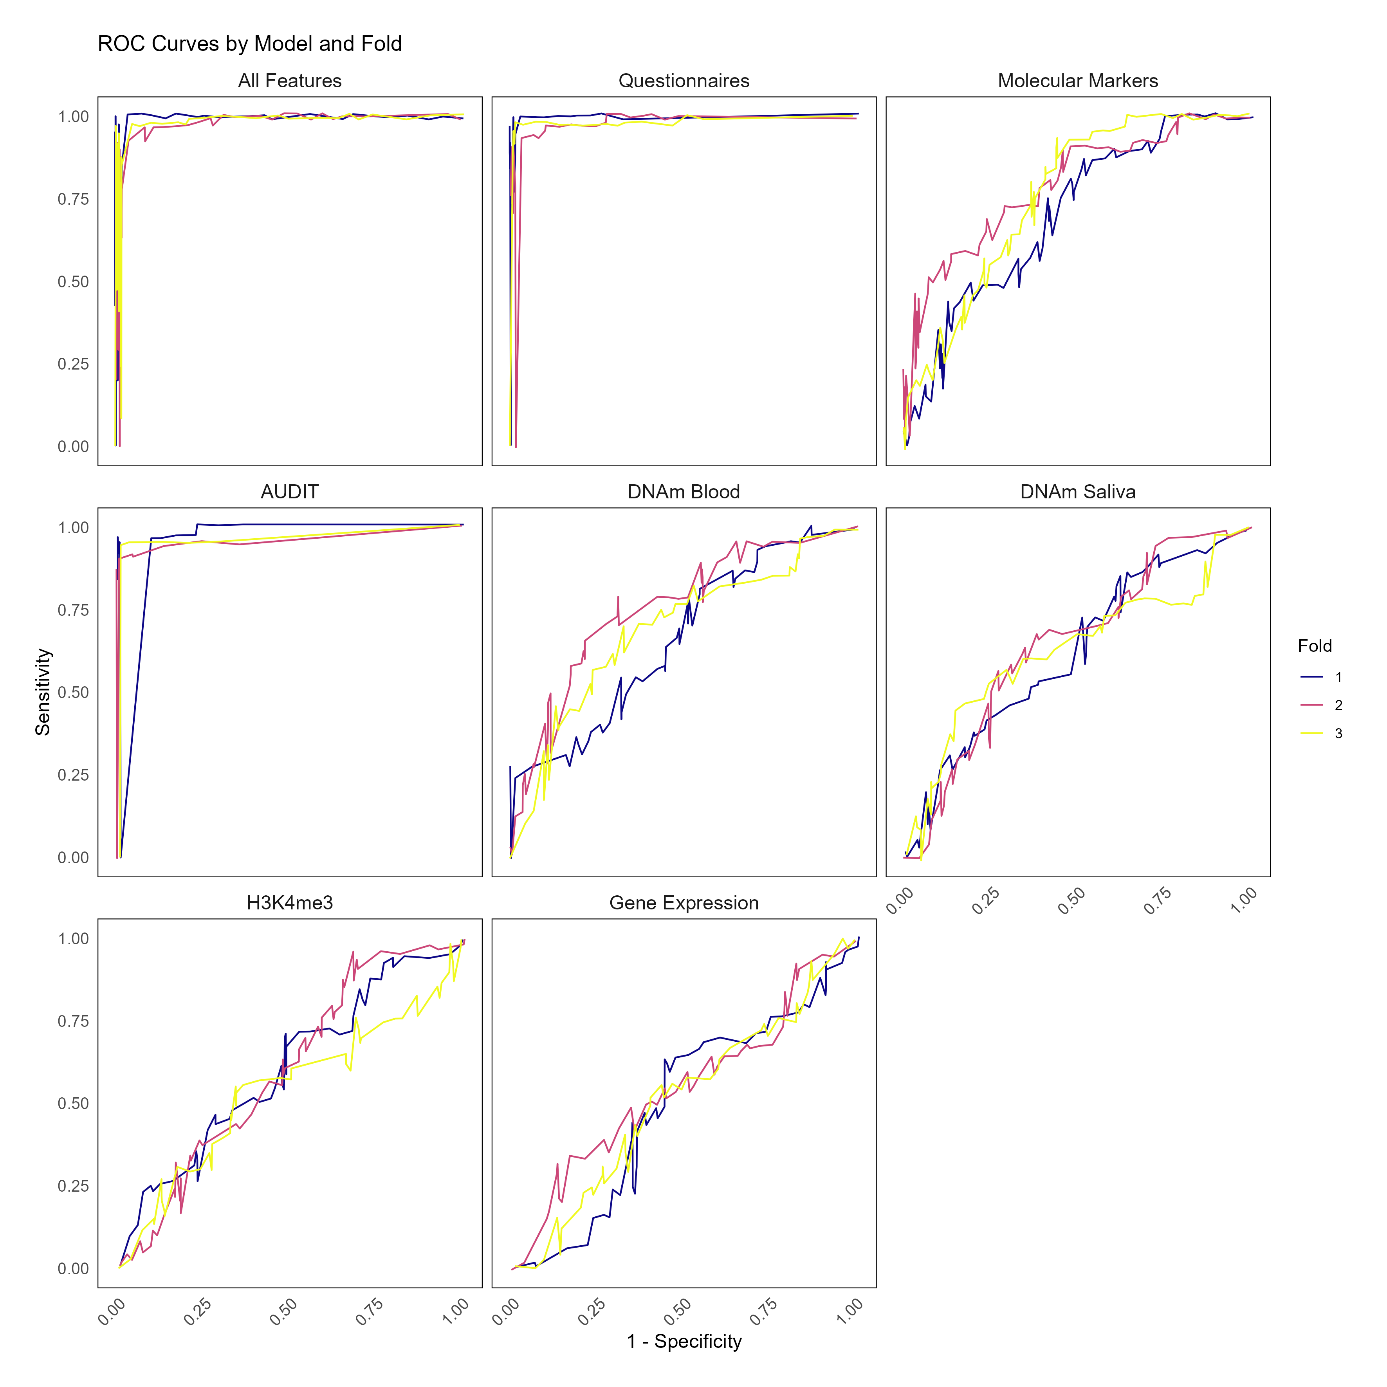


**Fig. S2: ROC curves of the different models.** Color codes corresponding to outer fold are displayed. Receiver-operating characteristic curve = ROC curve.
