# Supplementary material for: Regulation of HECW2 expression in Alcohol Use Disorder, therapy outcome and risk of relapse
Source: Research Square preprint supplement (doi:10.21203/rs.3.rs-8133046/v1), 2025-12-08
Supplement: Supplementary file 2 [file 9c9067ca5cc4fbe45a98289e.xlsx]

## Sheet: Table S1
Table S1: Clinical, demographic and molecular data of the cohort.
	group	age	sex	smoking	relapse status	BDI	GSI_T1	GSI_T2	OCDS_T1	OCDS_T2	AUDIT_T1	AUDIT_T3	AUDIT_T4	AUDIT_T2	DNAm_whole_blood_T1_[%]	DNAm_whole_blood_T2_[%]	DNAm_saliva_T1_[%]	DNAm_saliva_T2_[%]	H3K4me3_T1_[FC]	H3K4me3_T2_[FC]	GeneExpression_T1_[log2FC]	GeneExpression_T2_[log2FC]
1	AUD	54	male	yes		14	62	48	25	2	27				9.045	7.48	11.735	18.225	18.1465	6.46172	0.182903	0.662626
2	AUD	59	male	yes	abstinent	18	64		27	16	29				9.92	5.66	22.665	17.59	14.2175	10.497	2.8291	1.32193
3	AUD	57	female	no	abstinent	15	65	42	26	12	18	8			8.93	8.2	11.855	11.695	13.124	7.02374	-0.392621	1.27204
4	AUD	34	female	yes	relapsed	27	66	53	33	15	24	29			6.405	5.33	14.2	14.57	8.28794	4.89672	-0.265825	1.80076
5	AUD	42	male	yes		15	72		23		24				7.12				12.2522		0.722364
6	AUD	50	male	yes	relapsed	7	53	39	33	10	31				5.34	5.47	19.325	18.61	8.0227	5.98003	0.020644	2.03137
7	AUD	67	female	yes		48	80	52	30	14	37				8.01		28.05	24.675	5.77978	1.32128	1.74859
8	AUD	50	female	no	relapsed	7	44	36	28	15	22	15	22		7.71	10.515	17.385	16.98	23.1284	11.0932	0.569174	0.0880145
9	AUD	36	male	yes	relapsed	58	80	73	33	17	28				7.905	9.465	11.63	24.54	22.7429	9.24075	0.558536	-0.441982
10	AUD	64	male	no	abstinent	29	75	59	29	14	15	16			8.005	8.345	13.27	17.32	8.37134	15.0162	0.842749	1.89163
11	AUD	62	female	yes	relapsed	30	65	56	21	11	21	16			8.48	8.41	23.62	20.38	10.0837	12.257	0.297822	0.475323
12	AUD	37	male	yes				46		12	0				7.85	11.07	7.565	10.05	12.9707	8.88224	1.11662	0.0669701
13	AUD	40	male	yes		26	75	63	26	2	29			4	9.7	9.39	14.475	11.51	2.92503	4.23248	0.421005	1.53308
14	AUD	61	male	no	relapsed	34	80	75	34	23	28	23	25	22	6.42	4.135		20.6	38.1485	6.37984	1.24115	2.23784
15	AUD	40	male	yes	relapsed	36	75	69	20	18	5			2	5.5	6.05		18.39	5.22249	1.43475	1.66933	0.60873
16	AUD	57	female	yes		50	80	51	48	23	29			33	4.805	4.67	19.475	18.895	1.60238		-0.249308	-0.0652701
17	AUD	55	male	no	abstinent	11	64	58	28	26	35			23	5.64	6.06	9.225	15.925	2.13082	1.84196	-1.67881	0.0113996
18	AUD	43	male	yes	relapsed	25	65	37	23	10	29	18	28	16	5.1	4.83	15.8	19.955	2.61189	4.11002	0.379949	0.465781
19	AUD	33	female	yes		34	77	65	55	24	25				8.745	6.81	10.78		6.47219	4.50495	0.0158958
20	AUD	40	female	yes	relapsed	18	76	65	30	25	22				12.935	9.305	10.58	8.44	9.27002	7.46743	1.35126	0.777026
21	AUD	57	male	no		8	63	55	14	13	14				5.975	8.835	29.025		15.4164	7.00479	0.937525
22	AUD	46	male	no	relapsed	13	67	72	23	21	22		18		7.765	9.11	22.315	16.475	7.24076	1.71168	-0.32762	-0.572859
23	AUD	60	female	yes	relapsed	27	80	61	17	20	32				7.275	6.525	15.445	33.08	6.4294	5.33935	-2.23467	-0.691466
24	AUD	54	male	yes		41	71		34	31					7.6	10.34	38.57	49.295	8.25809	3.39162	-0.685587	-1.22454
25	AUD	71	female							10					5.68	5.365	12.835	10.7	11.9903	6.61836	0.363907	1.56385
26	AUD	31	female	no		2	58		5	1	19				5.495	6.215			8.44216		-0.79139	0.765882
27	AUD	58	female	no	relapsed	30	80	80	51	31	32		32		7.71	8.045	30.985	30.285	3.1779	2.94114	0.452361	1.2427
28	AUD	42	male	yes	relapsed	9	57	48	21	18	28	19	15		4.95	5.59	10.885	19.37	3.92567	2.07956		1.14145
29	AUD	49	male	no		12	62	53	28	21					6.695	8.155	22.795	30.05	2.695		0.717584	0.848288
30	AUD	67	male	yes		8	54	72	17	19	36				6.635	5.705	16.17	19.745	11.2947	9.97388	0.952146	0.373295
31	AUD	39	female	yes	relapsed	43		48	33	8	34		44		6.065	5.675	13.91	13.345	4.70267	4.63461	0.161821	-0.0466029
32	AUD	37	male	no		18	59		18		23				4.24		8.175		5.45338		0.049537
33	AUD	69	male	no	relapsed	12	68	54	35	17	32			19	5.44	5.16	7.385	9.205	1.27962	2.2805	0.321251	1.77311
34	AUD	54	female	no	relapsed	26	68	58	33	27	26	17		23	6.85	7.815	8.98	12.535	3.95054	2.4264	0.254287	0.32048
35	AUD	51	male	yes		26	76		28		36				7.45		7.705		1.5363		-1.37882
36	AUD	53	male	yes		8	58	49	8	15	15			29	6.675	5.555	12.925	11.615	1.68602	2.29604	-0.0639032	0.432425
37	AUD	21	female	yes	relapsed	37	63	62	46	27	36	34		23	6.47	5.27	19.005	16.315	1.40981	1.89595	0.446622
38	AUD	59	female	yes		23	68	58	37	23	33				5.415	5.89	12.705	17.5	3.10789	2.16551	2.60699	2.22501
39	AUD	44	male	na		0									6.25				6.06762		0.0972099
40	AUD	48	female	yes		30	70	42	27	7	36			24	6.06	6.425	7.79	5.71	1.39047	3.56805	-0.149368	1.58181
41	AUD	62	male	na		0									5.3		16.535		1.83059
42	AUD	53	male	yes		9	54	44	25	20	24			15	6.6	6.955	14.68	9.89	1.30699	0.51943	0.417072	0.990755
43	AUD	46	female	yes	relapsed	58	80		50		36	35			7.34		43.5		3.57765		1.01179
44	AUD	38	female	yes		26	67	53	32	8	34			26	6.26	7.37	15.535	19.86	4.89333	1.38253	0.461804	1.02056
45	AUD	43	male	yes		31	75	69	45	46	36			36	5.55	5.705	11.215	20.07	3.12995	2.42804	1.85434	1.02026
46	AUD	46	male	yes	relapsed	18	62	50	26	27	23	21		32	5.71	5.83	17.07	11.65	2.58059	1.18105	0.927879	0.607798
47	AUD	39	male	yes	relapsed	12	54	39	28	18	17			18	5.22	4.965	49.2	20.86	1.84251	4.71555	0.864169	1.72322
48	AUD	48	male	yes		10	53	50	27	22	15			22	6.03	5.895	10.315	15.87	4.49714	2.43669	0.797433	1.59739
49	AUD	69	male	yes	abstinent	0	46	40	30	18	25	8	1	23	6.39	7.05	6.52	11.895	6.46879	14.1331	-0.057052	-0.150822
50	AUD	61	male	yes	relapsed	15	57	59	29	32	22				4.725	4.905	17.37	27.82	12.6655	0.878455	-1.11567	0.270418
51	AUD	47	male	no	abstinent	10	64	54	33	29	27	4	2	26	5.795	4.74	8.755	9.925	1.06133	3.74013	-1.62349	0.406473
52	AUD	41	female	yes	relapsed	29	65	49	42	24	32	22	28	28	5.17	4.905	13.975	15.375		3.23484	0.00756765	0.503858
53	AUD	55	male	yes	abstinent	4	54	56	24	14	26			17	7.265	7.265	23.305	16.25	2.44242	0.934881	-1.41315
54	AUD	56	male	yes		17	67	60	37	25	30			23	6.83	8.59	10.74	13.835	5.36706	1.29212	1.55624	1.96453
55	AUD	24	male	yes	relapsed	49.5	80	58	33.5	25	37	29		37	9.17	6.095	20.34	13.355	3.34765	4.86279	0.29752	1.28268
56	AUD	37	female	yes		34.5	68	58	45	23	31.5			29	5.72	5.42	16.81	12.29	2.07651	0.922508	2.06023	2.30448
57	AUD	43	male	yes	relapsed	8	57		35		38	38	36		5.405		18.225		2.26547
58	AUD	48	male	yes	abstinent	0	55	55	18	13	11	6		18	4.785	4.5	6.285	6.265		2.85006	0.512735	1.45007
59	AUD	37	female	yes		33	64	52	38	20				0	4.74	5.565	44.845	11.36	0.85394	3.34384	1.18224	0.394043
60	AUD	53	female	yes		9	51		17		21				6.105		11.295		0.918415		1.50032
61	AUD	56	male	yes		9	58	48	11	8	7			8	6.175	7.265	26.81	11.27	1.04682	2.59515		2.78097
62	AUD	43	male	yes	relapsed	26.5	80	72	17	10	14	19		5	7.63	6.825	29.485	13.6	2.77321	1.97805	-0.0149441	-0.565288
63	AUD	59	male	no	relapsed	7	48	43	19	17	20		27	19	6.33	6.47	6.15	13.68	1.40355	2.07525		0.743922
64	AUD	53	male	yes		25	68	71	24	27.5	36.5			30	5.495	4.935	5.37	6.57	2.62153	7.69809	1.12215	0.500576
65	AUD	47	male	yes	relapsed	30	80	80	35.5	28	32	31.5	33	33	5.77	5.49	24.66	16.775	0.816744
66	AUD	70	male	yes	relapsed	20	60	80	37	18	32	28		26	4.875	4.96	13.63	27.04	2.77546	7.59602	1.39861	1.26838
67	AUD	50	male	yes	abstinent	28	76	54	36	21	32	21	0	32	6.28	6.285	32.64	26.27	7.83665	1.19417	-0.583183	0.0389995
68	AUD	37	male	yes		24.5	73	67	36	28	38			34		5.565	25.36	22.91	3.37535	6.04571	0.236017
69	AUD	62	male	yes	relapsed	19	67	35	37	0	23			27	5.705	5.82	23.36	15.665	4.45228	1.84304	1.02653	2.88128
70	AUD	28	male	no	abstinent	19	62	63	29	8	25	4	2	24	7.425	7.79	22.545	13.835	4.92299	0.866948	1.21777	-0.101688
71	AUD	62	male	no		14.5	48		15		16				6.1		7.665		4.7506		1.73568
72	AUD	58	female	yes	relapsed	11	50	49	10	3	9		18	12			19.2	17.325
73	AUD	70	male	yes	relapsed	19.5	63	62	33	25	24	2	25	24	4.44	5.835	19.145	9.73	2.56406		1.51475	0.34325
74	AUD	33	male	yes	relapsed	35	80		24		22		16		6.76		8.875		1.15458	1.42035	0.677632
75	AUD	62	female	no		35.5	72		32		30		2		5.55		16.42		0.67229
76	AUD	64	female	no		11	72	28	14	1	13			12	4.975	6.45	7.085	9.535	0.419044	0.958552	0.0724074	0.357503
77	AUD	70	male	no	abstinent	10	56		5		4				5.61		11.105		1.07674		1.44113
78	AUD	28	male	yes	abstinent	42.5	80		50		39				4.66		9.98		5.18625
79	AUD	63	female	no		16	61	44	16	14	22			17	7.07	6.825	18.155	12.295	2.04545	10.8929	-1.03657	0.20004
80	AUD	44	male	yes	relapsed	21	67	62	31	35	19		17	15	6.09	6.17	34.33	10.755	0.774287	2.23314
81	AUD	52	male	yes	abstinent	29	65	56	28	19	31	8		27	4.445	5.43	20.555	11.945	0.965225	0.571033		0.160251
82	AUD	50	male	yes	abstinent	12	64	60	31	27	21			26	6.12	5.99	10.45	13.245	0.446875	1.49659	0.811698	-0.00462471
83	AUD	38	male	yes		23	64	61	18	9	21	9	4	18		5.475		19.625	3.41297	5.26148
84	AUD	31	female	yes		33	69		31		30				7.6		34.515		1.19977
85	AUD	27	male	yes		16.5	59	49	17	25	33			30	8.765	7.62	35.125	9.37	1.0627	1.36896	-1.06862	-2.37511
86	AUD	42	female	yes		30.5	57		22	24	23			23	4.465	6.35	13.96	14.785	2.14513	0.552771	-1.36233	-1.74152
87	AUD	57	female	no	relapsed	38.5	68	50	40	21	33	24		35	5.055	6.71	12.165	19.845	4.29864
88	AUD	30	female	yes	relapsed	35	67	57	41	10	36	16		24	8.175	5.975	12.42	33.64	0.537719	2.94849	0.150476	1.09293
89	AUD	74	male	yes		11	60	57	14	9	30			19	4.585	5.425	36.345	8.785	3.56404
90	AUD	55	female	yes		14	80	62	10	19	23			33	5.71	6.08	29.87		4.27343	5.24245	0.199649	1.09465
91	AUD	38	male	yes	relapsed	10	52		32		28	5			4.59	5.8			4.21803	7.41564
92	AUD	41	male	yes	abstinent	37	80	49	42	7	35	0		24	5.345	29.255			5.17691	13.2297
93	AUD	68	male	no	abstinent	24	75	68	28	21	28	4		25	6.935	26.915			5.00527	8.95538	0.241695
94	AUD	57	male	yes		35	71	71	29	15	35			23	31.315	4.555			11.6806		1.04409	0.219029
95	AUD	65	male	yes		9	58	45	21	9	17			24	19.295	22.425			5.7542		1.91081
96	AUD	49	male	yes	relapsed	21	63	57	28	26	19	23		21	6.76						0.350757	1.4311
97	AUD	35	female	yes	relapsed	30	63	66	22	18	31			20	5.92
98	AUD	48	male	no		0	51	37	20	13	24			17	5.055							-0.119464
99	AUD	27	female	yes	relapsed	24	59	50	38	31	19			24	6.265						1.26478	1.4091
100	AUD	56	female	yes	relapsed	20	61	58	26	29	29	26		30							-0.275574	-0.096421
101	AUD	65	male	yes		12	72	51	25	21	31	24		34							-0.93758	-0.551422
102	AUD	52	male	yes		16	63		19		20										-0.00535454	0.883226
103	AUD	38	male	yes	abstinent	11	58	48	15	16	26			28							0.591317	0.0040073
104	AUD	23	female	yes		46	80	58	52	48	37			36							0.557163	0.169404
105	AUD	62	male	no	relapsed	15	62	68	35	27	34	8		32							-1.79107	-1.11049
106	AUD	39	female	yes	relapsed	35	75	59	43	27	35	26		38		6.775					0.450531	0.216264
107	AUD	62	male	no		11	58	48		16				17								-0.792568
108	AUD	47	female	yes		15	52	54	15	11	18			22		4.895					-0.501522	-0.525324
109	AUD	46	male	no		14	72	72	44	2	28			18	5.955
110	AUD		female												5.795
111	AUD	51	female	no	relapsed	18	69	39	25	22	19			25		5.915
112	AUD	45	male	yes		16	66	60	26	28	27			24	7.71
113	AUD	57	male	yes		10	57	41	9	7	17			12	5.68	5.545
114	AUD	57	male	yes		27	68	62	30	13	31			22
115	AUD	54	male	yes		13	73	43	34	16	21			20
116	AUD	25	male	yes		28	74	74	32	25	23			25
117	AUD	34	male	yes		34	73	67	33	35	26			27		6.21
118	AUD	63	female	yes		29	68	40	24	18	16			24		6.27
119	AUD	53	male	no		16	57		36		31
120	AUD	59	male	yes							31
121	HC	55	female	no		22	49	53	0	0	1	1	1		7.665	8.48	15.425	16.095	9.75242	4.97879	0.562616
122	HC	69	male	no		20	68	67	0	0	0	0			6.09	7.76	40.285	31.695	9.80122	15.5526
123	HC	42	female	no		4	48	50	0	1	1	2			10.875	11.59	40.16	25.81	18.0214	15.2871	1.51177	0.616573
124	HC	43	female	no		9	49	41	0	0	1	1	1		8.25	9.455	15.81	12.17	14.6915	20.7404	1.47429	1.51505
125	HC	38	female	no		0	38	42	2	1	3	2			7.83	8.81	8.85	7.22	9.08685	19.3735	-0.344738	0.998974
126	HC	59	male	no		7	59		1		4				6.565		13.065				0.814066
127	HC	34	male	no		11	50	42	0	0	1				9.19	8.83	25.46	32.215	7.90506	5.52784	1.45294
128	HC	51	male	no		2	48	46	3	1	2	2	2		7.305	7.56	10.54	34.745	3.73222		0.101091
129	HC	67	male	no		1	27	53	8	8	6	10			6.015	8.055	16.72	11.585	4.79042	9.43495	0.945849	0.500324
130	HC	51	female	no		0	38	41	0	0	1	1	1		9.925	9.35	14.675	12.245	4.81041	4.05944	1.25532	1.57023
131	HC	69	male	yes		3	52	48	13	6	6				5.96	7.41	17.7	12.065	5.80139	8.80499	1.16888	0.374215
132	HC	38	male	no		4	50	49	6	3	5				7.36	8.485	17.82	31.12	4.48686	9.8326	0.370976
133	HC	20	female	no		1	39	39	0	1	1	2	2		9.34	10.22	12.08	17.365	3.45302	5.22359	1.98093
134	HC	32	female	no		6	48	50	3	4	11	9	7		9.12	9.225	40.705	21.175	3.21937		0.623522
135	HC	68	female	no		3	54	50	1	1	2	1	1		8.415	6.99	13.31	14.55	3.82922	5.81223	1.25482	0.300088
136	HC	28	female	yes		15	52	50	15	13	10	10			8.06	10.17	70.275		4.85464	4.21893		0.501142
137	HC	41	male	no		9	48	53	2	3	3	3	3		9.12	8.685	63.71	47.845	2.29003	2.64403		-0.643804
138	HC	62	female	no		1	42	45	0	1	1	1	1		6.71	7.395	11.435	7.995	4.31175	4.13424	1.51343	1.10076
139	HC	34	female	no		0	32	36	4	4	1				7.59	7.1	18.46	10.415	0.884271	2.66036	1.19717	0.571559
140	HC	53	female	no		4	49		0	0	0	0	0		9.31	9.67	26.325	21.96	11.4403	6.30997	-0.809592	-0.338042
141	HC	44	female	yes		2	50	44	1	1	2	3	3		6.835	6.935	10.56	29.26	0.540694		0.715094
142	HC	35	female	no		0	34	27	0	0	1	1	1		10.135	8.22	20.715	21.055	1	1.95418	2.54907	1.30256
143	HC	62	female	no		1	43	49	0	0	1	1	1		8.815	7.67	17.8	14.58	8.49046	1.23765	0.239805	0.621755
144	HC	59	female	no		4	40	40	6	9	2	2	2		8.81	7.835	21.59	16.84	7.23391	4.08256	1.80559	1.22785
145	HC	34	female	no		11	48	43	1	1	2		2		9.175	8.18	27.675		3.09957	4.28374	1.68974
146	HC	31	male	no		0	38	38	3	2	5	2			10.3	11.86	13.16	16.435	8.20389	2.27376	0.919997
147	HC	56	female	no		9	55	60	0	0	2	3	0		6.945	7.415	8.795	10.18	5.16114	1.64643	-0.00946171	0.678553
148	HC	39	female	no		0	43	39	2	1	1	1	1		5.365	7.575	13.825	16.07	3.03042	3.05106		2.0006
149	HC	55	female	no		0	45		2	0	3	4	2		5.7	8.025	15.8	52.54	4.88367	4.29585		0.251267
150	HC	24	male	no		10			0	0					9.155	9.185	32.075	34.015	6.5887	1.46445
151	HC	30	female	no		1	48	48	1	1	3	3			8.45	8.595	21.475	27.21	4.25309	2.32112		0.930671
152	HC	27	female	no		0	41	38	1	1	3	2	1		10.625	10.37	13.38	8.455	3.62525	1.83013
153	HC	25	female	no		0	38	35	0	1	3	3			8.645	8.715	13.35	21.785	3.83338	2.21757
154	HC	22	male	no		2	54	53	3	2	4	0	4	5	8.815	8.035	24.065	25.25	2.60978	2.5707		0.0639947
155	HC	25	female	no		20	60	49	0	0	1	1			8.405	7.125	16.54	18.215	3.31466	1.7984		0.769841
156	HC	28	female	no		1	38	38	1	1	6			6	11.005	9.43	22.625	23.49	2.09825	3.01918		1.04975
157	HC	29	female	no		8	42	35	2	0	4	2	2	2	10.185	11.81	16.87	16.285	3.05998	4.47177	1.17405	0.500133
158	HC	27	female	no		6	48	48	1	2	7	9	7	7	7.15	8.595	24.515	48.96	4.0385	2.03781
159	HC	24	male	no		4	55	55	2	6	11	9	9	9	10.12	11.18	12.975	23.445	2.34872	1.72253
160	HC	27	male	no		2	53	58	1	2	7	6		7	7.13	6.875	47.96	41.99	1.78982	2.25251	1.29298	1.00531
161	HC	29	male	no		5	41	48	6	2	11	11		11	9.58	11.205	35.775	38.19	3.67832	2.83402		0.934312
162	HC	25	male	no		12	54	46	3	1	6	5		4	9.185	9.6	18.005	38.465	1.45515	2.22655	2.16068
163	HC	30	male	no		1	41	41	5	2	4	4	0	4	7.97	7.38	36.46	50.355	4.82363	0.0857065	0.105524
164	HC	32	female	no		10	50	45	5	3	5	7	4	3	7.36	5.1	9.56	16.11	6.52234	2.63201	0.893748
165	HC	44	male	no		7	54	67	2	1	6	4		6	5.875	6.7	22.105	29.95	5.0657	4.62672		1.83701
166	HC	56	female	no		5	41	38	3	4	3	3	3	3	7.225	8.805	13.505	14.61	2.77498	4.77788	0.191284	0.18991
167	HC	33	female	no		10	53	58	1	1	2	2	2	2	10.18	8.655	33.88	36.575	2.76063	3.19216	-0.509251	0.0799487
168	HC	32	female	no		12	64	59	3	2	5	1	0	3	7.315	7.485	19.025	16.455	2.91945	3.55117	1.18825	2.0825
169	HC	41	male	yes		7	49	50	1	0	2			2	6.205	9.86	11.11	13.06	10.8301	8.41791	0.914154	0.278777
170	HC	30	male	no		0	39	40	1	1	2	2	2	2	7.235	8.41	43.055	44.69	5.19872	6.17573		1.20969
171	HC	27	female	no		6	45	38	1	1	3	2	3	4	9.835	7.57	36.45	46.82	3.83364	2.38303
172	HC	61	male	no		4	54	46	1	1	3			3	7.2	10.73	27.48	21.55	3.66958	2.57101
173	HC	56	female	no		0	26	26	0	0	0	0	0	0	9.19	9.16	47.05	59.065	5.11646	3.17488
174	HC	54	female	no		7	42	51	1	0	1	2	1	1	7.055	7.6	17.505	17.335	4.49598	2.04749		1.09917
175	HC	30	female	no		6	51	44	3	2	6	4		5	7.8	7.235	34.85	19.165	0.131557	1.59974	0.774536
176	HC	31	male	no		8	45	41	2	2	2	2	2	2	9.755	9.165	13.975	26.11	1.70553	10.5974	0.292316
177	HC	38	male	no		11	65	63	0	0	0	2	2	2	7.45	6.855	10.66	14.85	1.37741	2.13131	-0.182732	0.147542
178	HC	30	female	no		1	46	42	1	1	3	2	2	1	7.585	7.495	21.08	19.45	2.36771	0.993698	0.805095	0.925808
179	HC	28	female	no		2	45	35	1	1	3	3	3	3	13.065	7.35	35.18	19.61	2.06002	0.217079	0.65961	1.1007
180	HC	47	female	no		0	28	28	0	6	2	2	2	3	7.635		9.76	7.445	0.497125	0.758612		1.56068
181	HC	25	female	no		0	45	40	0	1	4	3	4	4	10.43	8.46	16.475	19.29	1.04314	0.0434153	0.114971
182	HC	33	female	no		2	48	40	1	0	1	1	1	1	8.545	8.97	14.39	13.39	1.52572	0.537441		0.144749
183	HC	24	female	no		0	42	38	2	2	4	3	2	4	9.46	9.43	18.755	11.965	1.07387	0.200413	-0.24763	-0.0703754
184	HC	35	female	no		0	32	27	0	0	1	1	1	1	6.745	5.86	27.21	27.8	1.37322	0.894107	0	1.33115
185	HC	30	female	no		1	39		2	0	3	3	3	0	8.375	9.365	8.25	30.135		3.29399	1.24411	1.26727
186	HC	54	female			0	26	33	1	1	2	1	1	1	7.415	12.58	18.94	19.445		2.58414
187	HC	55	female	no		0	33	36	0	0	0	0	0	0	5.715	6.425	11.125	9.77		5.59276	0.810216	0.822262
188	HC	23	male	no		0	39	33	2	1	5	4	3	4	7.785	7.35	20.635	16.48		6.3414	0.758011	1.2177
189	HC	27	female	no		0	37	35	0	1	1	1	0	1	6.365	7.105	16.51	53.4		2.50746		0.866534
190	HC	49	female	no		0	38	38	1	1	2	2	1	2	8.49	9.575	39.21	39.92		1.02229	0.326575
191	HC	53	female	no		0	26	26	4	0	1	0	0	1	5.14	5.77	34.985	24.695		4.08643
192	HC	33	female	no		3	46	39	3	2	3	3	3	4	7.765	9.76	23.96	40.88	0.701281	4.16871
193	HC	55	female	no		8	51	48	7	6		12.5	15	11	7.295	6.315	10.115		2.24463		-0.0203921	-0.129578
194	HC	32	female	no		11	60	62	3	2	5	7	4	4	11.57	13.28	8.53	13.525	1.50551	9.90177	0.484824	2.1224
195	HC	51	female	no		9	53	50	2	1	2	1		2	6.695	7.855	20.69	20.565	1.501	2.08853
196	HC	60	female	no		3	43	48	2	3	3	3	3	4	7.34	6.465	25.485	29.26	3.05515	0.990927	-0.0174865	1.44991
197	HC	59	female	no		12	58	52	1	1	2	2	2	2	6.635	6.405	16.1	21.695	1.92747	3.7294	2.38945
198	HC	52	male	no		0	46	45	7	2	2	2	2	3	6.97	4.505	13.33	22.095	2.81181	0.325122	0.16223	-0.427539
199	HC	53	male			3	44	41	1	0	2	1	1	1	8.685	7.93	74.98	63.775	1.01934	5.73947	0.936699	1.22497
200	HC	50	male	no		2	52	49	1	1	2	2	1	1	7.62	6.9	19.585	28.73	0.70854	0.262335
201	HC	69	male	na		0			7	4	8			5	6.975	5.95	21.165	16.455	0.108301	2.42244	0.785975	0.638952
202	HC	54	male	no		2	45	43	1	1	2	2	2	2	6.78	5.4	23.97	12.725	3.433	2.11094	1.1032
203	HC	66	male	no		10	58	54	1	1	1	1	1	1	5.465	4.81	8.975	8.17				0.749627
204	HC	50	male	no		1	34	34	0	0	0	0	0	0	9.89	8.31	15.935	18.965	3.11529	2.11116		0.210811
205	HC	58	male	no		6	58	58	12	13	7	11	11	9	5.38	5.215	7.18	8.165	1.509
206	HC	39	male	no		0	31	31	1	1	3	3		3	4.955	6.13			7.55161			1.14132
207	HC	55	female	no		0	26	26	0		1				7.325	30.035
208	HC	54	male	no		0	30	30	2	3	7			5	5.99	35.34
209	HC	38	male	no		0	31	31	1	1	2			3	37.3	6.975
210	HC	68	male	no		1	27	27	2	1	2			2	6.465

## Sheet: Table S2
Table S2: Shapiro-Wilk results of all data.					AUD	AUD patient group
Group	Column	W-Statistic	P-Value		HC	Healthy control group
AUD	age	0.982362	0.121
AUD	GSI_T1	0.967362	0.007
AUD	GSI_T2	0.989673	0.666
AUD	OCDS_T1	0.990092	0.587
AUD	OCDS_T2	0.978552	0.099
AUD	AUDIT_T1	0.958602	0.002
AUD	AUDIT_T2	0.961311	0.022
AUD	DNAm_b_T1	0.498003	0
AUD	DNAm_b_T2	0.498901	0
AUD	DNAm_ora_T1	0.898159	0
AUD	DNAm_ora_T2	0.883208	0
AUD	H3K4me3_T1	0.722298	0
AUD	H3K4me3_T2	0.87665	0
AUD	GE_log_T1	0.985704	0.448
AUD	GE_log_T2	0.988379	0.713
HC	age	0.926593	0
HC	GSI_T1	0.981819	0.254
HC	GSI_T2	0.981991	0.29
HC	OCDS_T1	0.701246	0
HC	OCDS_T2	0.657547	0
HC	AUDIT_T1	0.858001	0
HC	AUDIT_T2	0.876872	0
HC	DNAm_b_T1	0.472926	0
HC	DNAm_b_T2	0.517565	0
HC	DNAm_ora_T1	0.824192	0
HC	DNAm_ora_T2	0.905316	0
HC	H3K4me3_T1	0.844002	0
HC	H3K4me3_T2	0.748523	0
HC	GE_log_T1	0.987959	0.868
HC	GE_log_T2	0.989195	0.916

## Sheet: Table S3
Table S3: Cohort scores for variables AUDIT, OCDS, BDI, GSI, blood DNAm, saliva DNAm, and H3K4me3 level after MI, as well as results of the Wilcoxon rank sum test for testing differences in the respective values before vs. after MI are displayed.
Variable	HC	AD	p (W)
AUDIT score mean ± SD	3.21 ± 2.65	25.74 ± 8.22	0.8223 (20731)
OCDS score mean ± SD	2.13 ± 2.82	27.96 ± 10.65	0.8961 (21157)
BDI score mean ± SD	4.34 ± 5.03	21.56 ± 12.53	0.8576 (21410)
GSI score mean ± SD	44.84 ± 9.93	65.63 ± 9.36	0.8621 (20896)
DNAm blood [%] mean ± SD	7.93 ± 1.51	6.43 ± 1.27	0.9617 (20006)
DNAm saliva [%] mean ± SD	19.63 ± 8.76	15.91 ± 7.27	0.3755 (18685)
H3K4me3 [F] mean ± SD	3.53 ± 2.18	4.10 ± 3.10	0.8998 (17611)
gene expression [F] mean ± SD	0.67 ± 0.71	0.45 ± 0.84	1.000 (21841)

## Sheet: Table S4
Table S4: Results of the generalized linear mixed effects model using the formula: Whole blood DNAm ~ group*time + age + sex + smoking + (1|ID)
	Estimate	Std. Error	t value	Pr(>|z|)
(Intercept)	1.75464	0.214741	8.17096	3.06e-16
groupHC	0.178785	0.0780679	2.29012	0.0220145
time2	0.0310763	0.030694	1.01246	0.31132
sexmale	0.00097114	0.0542371	0.0179055	0.985714
age_scaled	-0.0351278	0.0273573	-1.28404	0.199129
smokingno	0.139685	0.211556	0.660275	0.509077
smokingyes	0.100797	0.21186	0.475772	0.634237
groupHC:time2	0.00034429	0.0428128	0.00804181	0.993584

## Sheet: Table S5
Table S5: Results of the generalized linear mixed effects model using the formula: Saliva DNAm ~ group*time + age + sex + smoking +(1|ID)
	Estimate	Std. Error	t value	Pr(>|z|)
(Intercept)	2.85185	0.433631	6.57667	4.81098e-11
groupHC	0.223492	0.139216	1.60536	0.108414
time2	-0.0337056	0.0449505	-0.749838	0.453352
sexmale	-0.000549241	0.0964404	-0.00569513	0.995456
age_scaled	-0.0770618	0.0482484	-1.59719	0.110224
smokingno	-0.162096	0.421515	-0.384556	0.700566
smokingyes	-0.0430306	0.427606	-0.100631	0.919843
groupHC:time2	0.120833	0.0614094	1.96766	0.0491071

## Sheet: Table S6
Table S6: Results of the generalized linear mixed effects model using the formula: H3K4me3 ~ group*time + age + sex + smoking + (1|ID)
	Estimate	Std. Error	t value	Pr(>|z|)
(Intercept)	0.662851	0.57671	1.14937	0.250405
groupHC	-0.0625127	0.219581	-0.28469	0.775882
time2	-0.120439	0.090503	-1.33078	0.183262
sexmale	0.156742	0.151302	1.03595	0.300224
age_scaled	0.103549	0.0754061	1.37322	0.169683
smokingno	0.5574	0.563499	0.989176	0.322577
smokingyes	0.48679	0.566045	0.859985	0.389798
groupHC:time2	0.000683533	0.128474	0.00532038	0.995755

## Sheet: Table S7
Table S7: Results of the generalized linear mixed effects model using the formula: Gene expression ~ group*time + age + sex + smoking + (1|ID)
	Estimate	Std. Error	df	t value	Pr(>|t|)
(Intercept)	0.0631585	0.686708	170.263	0.0919727	0.926828
groupHC	0.53307	0.202424	200.415	2.63344	0.00911193
time2	0.257784	0.099339	118.946	2.59499	0.0106493
sexmale	-0.0400628	0.135822	158.494	-0.294965	0.768407
age	0.0019092	0.00509505	156.982	0.374717	0.708376
smokingno	0.110346	0.598936	167.969	0.184236	0.85405
smokingyes	0.290415	0.608369	169.456	0.477366	0.633716
groupHC:time2	-0.223802	0.166261	137.892	-1.34609	0.180482

## Sheet: Table S8
Table S8: Model performances are shown as measured using AUC and Cohen’s Kappa, as well as sensitivity, specificity, and the model’s p-value as compared to the Non-Information Rate (NIR accuracy = .5714).
Model Name	Accuracy [%]	AUC	Cohen’s Kappa	Sensitivity	Specificity	p-value (AUC > NIR)
All Features	97.38	0.995	0.95	0.9808	0.968	<0.0001
Questionnaires	96.51	0.9923	0.93	0.9808	0.968	<0.0001
Molecular Marks	67.46	0.7572	0.33	0.5486	0.7714	0.0467
AUDIT	97.22	0.9753	0.94	0.9904	0.9584	<0.0001
Blood DNAm	63.81	0.7061	0.25	0.5135	0.7333	0.1511
Saliva DNAm	55.79	0.6354	0.09	0.4588	0.6319	0.6067
H3K4me3	59.13	0.5812	0.16	0.6456	0.6883	0.3925
Gene Expression	52.86	0.5167	0.02	0.3676	0.6536	0.7729

## Sheet: Table S9
Table S9: Feature importance values of the multimodal models.
	All Features	Questionnaires	Molecular marks
Feature	Value
AUDIT	97.65	71.69	-
BDI	29.82	4.09	-
GSI	38.58	8.18	-
OCDS	97.94	98.94	-
DNAm blood	12.08	-	100
DNAm saliva	2.47	-	8.07
H3K4me3	0.66	-	0
Gene expression	0.81		20.71
